# Supplementary material
Source: HighWire-hosted journal article supplement (https://gut.bmj.com/content/70/1/148)

**Supplementary Figure 1.**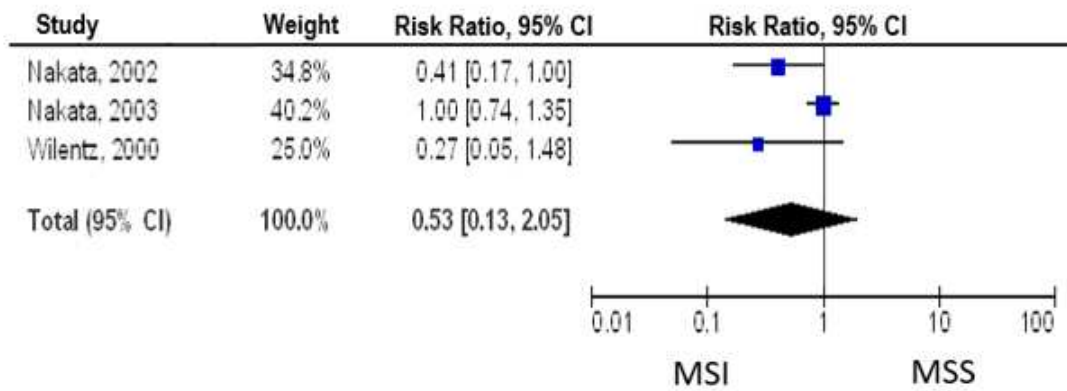**Supplementary Figure 2.**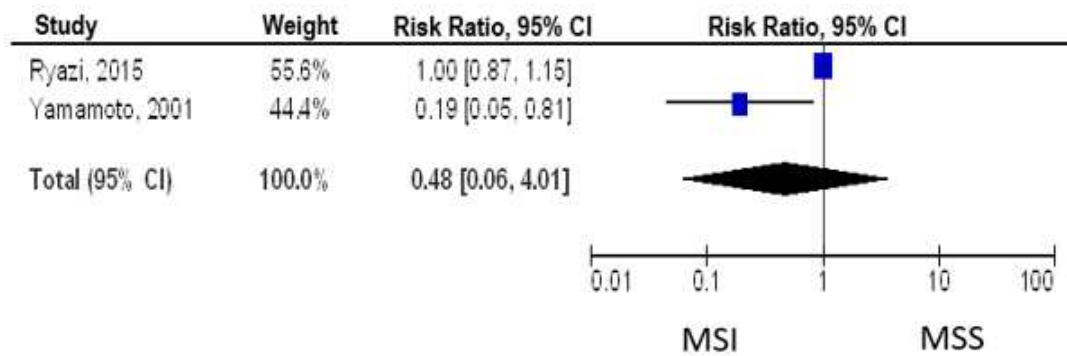**Supplementary Figure 3.**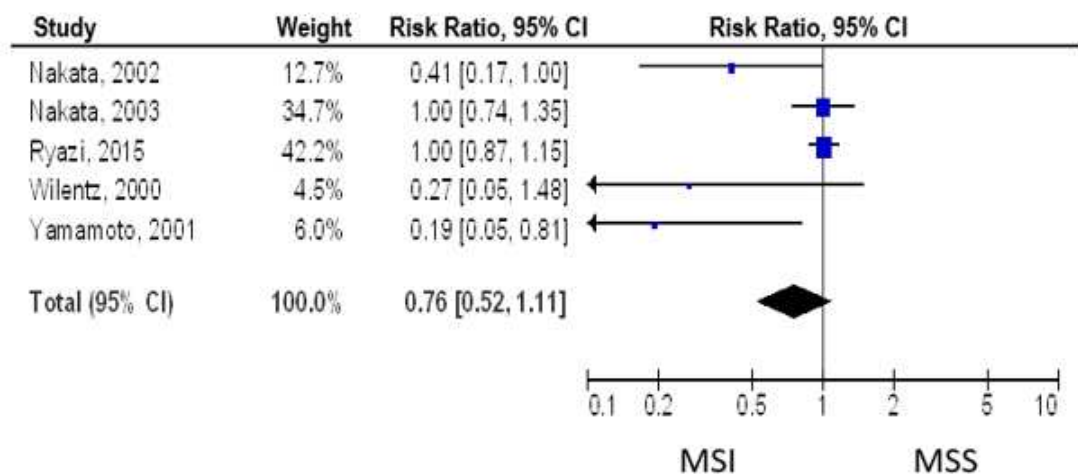

Supplement: inline-supplementary-material-1 [file inline-supplementary-material-1.pdf]
